# Supplementary material for: Resting-State Network Connectivity in Newly Diagnosed Drug-Naïve Parkinson’s Disease Patients With Mild Cognitive Impairment
Source: Research Square preprint supplement (doi:10.21203/rs.3.rs-428251/v1), 2021-04-21
Supplement: Supplementary file 2 [file be782775d4539757d73efab9.docx]

**Resting-state network connectivity in newly diagnosed drug-naïve Parkinson’s disease patients with mild cognitive impairment**

Yanbing Hou1, Qianqian Wei1, Ruwei Ou1, Lingyu Zhang1, Xiaoqin Yuan1, Qiyong Gong2*, Huifang Shang1*

1 Department of neurology, Laboratory of Neurodegenerative Disorders, National Clinical Research Center for Geriatrics, West China Hospital, Sichuan University, Chengdu, Sichuan, China

2 Huaxi MR Research Center (HMRRC), Department of Radiology, West China Hospital, Sichuan University, Chengdu, Sichuan, China

*Correspondence to Huifang Shang, MD, Department of Neurology, National Clinical Research Center for Geriatrics, West China Hospital, Sichuan University, Chengdu 610041, Sichuan, China. Tel: 0086-18980602127, Fax: 0086-028-85423550. E-mail: hfshang2002@126.com. Qiyong Gong, PhD, Huaxi MR Research Center (HMRRC), Department of Radiology, West China Hospital, Sichuan University, Chengdu 610041, Sichuan, China. E-mail: huaxigongqy@163.com

2. Materials and methods

2.2 MRI data acquisition

The sequences of conventional MRI were performed as follows: (1) The T1-weighted imaging: repetition time/echo time (TR/TE) = 1600/9.2 m, flip angle (FA) = 130°, field of view (FOV) = 250 × 250 mm2, matrix size = 148 × 320, voxel size = 1.2 × 0.8 × 5.0 mm3, axial slices = 21; (2) The T2-weighted imaging: TR/TE = 4000/93 m, FA = 120°, FOV = 220 × 220 mm2, matrix size = 230 × 320, voxel size = 0.8 × 0.7 × 5.0 mm3, axial slices = 21; (3) The fluid-attenuated inversion recovery imaging: TR/TE = 6000/93 m, FA = 130°; FOV = 220 × 220 mm2, matrix size = 198 × 256, voxel size = 1.0 × 0.9 × 5.0 mm3, axial slices = 21.
